# Supplementary material for: Synthesis of highly functionalised plasma polymer films from protonated precursor ions via the plasma α–γ transition
Source: Royal Society of Chemistry journal article supplement (doi:10.1039/c6cp08630f), 2017-01-01
Supplement: c6cp08630f1.pdf [file c6cp08630f1.pdf]

## Synthesizing highly functionalised plasma polymer films from protonated precursor ions via the plasma $\alpha$ - $\gamma$ transition.

*Solmaz Saboohi<sup>1</sup>, Bryan R. Coad<sup>1</sup>, Hans J. Griesser<sup>1</sup>, Andrew Michelmore<sup>1,2</sup>,  
Robert D. Short<sup>1,3</sup>*

1. *Future Industries Institute, University of South Australia, Mawson Lakes, South Australia 5095, Australia*

2. *School of Engineering, University of South Australia, Mawson Lakes, South Australia 5095, Australia*

3. *Materials Science Institute and Department of Chemistry, University of Lancaster, City of Lancaster, UK*

### Supporting Information

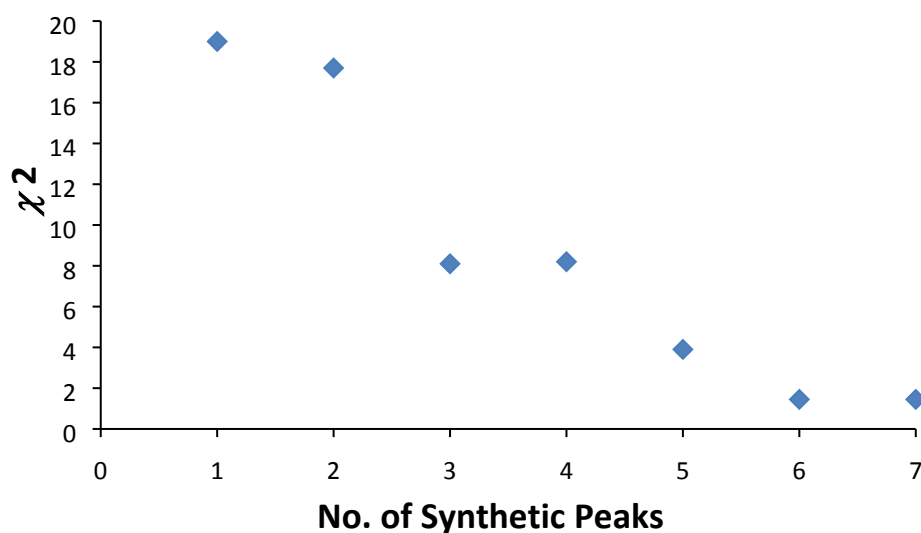

Figure S1.  $\chi^2$  analysis of XPS curve fitting for EIB  $\alpha$  mode.
